# Supplementary material
Source: publisher figshare collection journal article supplement (https://gsajournals.figshare.com/ndownloader/files/14641148)
Supplement: Supplementary file 1 [file 14641148]

## Sheet: gProfiler
t type	t name	p-value	T	Q	Q&T	Q&T/Q	Q&T/T	term ID	Q&T list
BP	pigmentation	8.23e-52	100	224	42	0.188	0.42	GO:0043473	O75865,O43623,O00194,Q96EV8,Q92995,P51159,Q9BXS5,Q06413,P29992,O75882,P56693,P62491,P10071,P17643,Q8N565,Q13637,P57729,P14138,Q99966,O00203,P24530,Q9H1H9,Q13402,P62820,Q8TF72,Q9UJU2,Q13796,P14416,P50148,P10721,Q05925,Q9P2N4,O43747,O60315,P10415,P59510,P07101,Q15907,P40967,O75030,Q9Y4I1,Q01726
BP	energy reserve metabolic process	0.00288	91	224	6	0.027	0.066	GO:0006112	O94808,Q96G30,P01106,P32245,P13945,Q06210
BP	protein tetramerization	0.00612	146	224	7	0.031	0.048	GO:0051262	Q9HCF6,Q96QT4,Q9BX84,Q9H0N5,Q7Z4N2,P61457,P12268
BP	phosphatidylinositol-3-phosphate biosynthetic process	0.00952	50	224	4	0.018	0.08	GO:0036092	P21802,P22607,P11362,P22455
BP	natural killer cell degranulation	0.00957	7	224	2	0.009	0.286	GO:0043320	P51159,O43747
BP	positive regulation of calcineurin-mediated signaling	0.0149	9	224	2	0.009	0.222	GO:0106058	P21860,Q02297
BP	histone H4 deacetylation	0.0149	9	224	2	0.009	0.222	GO:0070933	Q13547,Q92769
BP	B cell homeostasis	0.0149	29	224	3	0.013	0.103	GO:0001782	Q16611,Q06413,P10415
BP	astrocyte activation	0.0149	9	224	2	0.009	0.222	GO:0048143	P49768,P00533
BP	positive regulation of B cell proliferation	0.0276	38	224	3	0.013	0.079	GO:0030890	Q06413,P56704,P10415
BP	negative regulation of DNA damage response, signal transduction by p53 class mediator	0.0276	13	224	2	0.009	0.154	GO:0043518	O43623,O95863
BP	memory T cell proliferation	0.0303	1	224	1	0.004	1	GO:0061485	Q8NF50
BP	optic cup structural organization	0.0303	1	224	1	0.004	1	GO:0003409	P05549
BP	acetoacetic acid metabolic process	0.0303	1	224	1	0.004	1	GO:0043438	P17643
BP	sagittal suture morphogenesis	0.0303	1	224	1	0.004	1	GO:0060367	P10071
BP	positive regulation of mini excitatory postsynaptic potential	0.0303	1	224	1	0.004	1	GO:0061885	P07550
BP	substance P catabolic process	0.0303	1	224	1	0.004	1	GO:0010814	P42892
BP	Cajal-Retzius cell differentiation	0.0303	1	224	1	0.004	1	GO:0021870	P49768
BP	melanocyte adhesion	0.0303	1	224	1	0.004	1	GO:0097326	P10721
BP	lambdoid suture morphogenesis	0.0303	1	224	1	0.004	1	GO:0060366	P10071
BP	Spemann organizer formation at the anterior end of the primitive streak	0.0303	1	224	1	0.004	1	GO:0060064	P56703
BP	rhythmic excitation	0.0303	1	224	1	0.004	1	GO:0043179	P05305
BP	calcitonin catabolic process	0.0303	1	224	1	0.004	1	GO:0010816	P42892
BP	desmosome disassembly	0.0303	1	224	1	0.004	1	GO:0035921	O43623
BP	epithelial cell proliferation involved in prostatic bud elongation	0.0303	1	224	1	0.004	1	GO:0060517	P48436
BP	endothelin maturation	0.0303	1	224	1	0.004	1	GO:0034959	P42892
BP	chromatin remodeling	0.031	163	224	6	0.027	0.037	GO:0006338	P23759,P23771,Q13547,P48436,P01106,Q92769
BP	cellular response to low-density lipoprotein particle stimulus	0.0361	16	224	2	0.009	0.125	GO:0071404	P05556,P05107
BP	epithelial to mesenchymal transition involved in endocardial cushion formation	0.0397	17	224	2	0.009	0.118	GO:0003198	O43623,O95863
BP	cell-cell junction organization	0.0428	229	224	7	0.031	0.031	GO:0045216	O43623,O95863,P25054,P19022,P10415,P55283,P07333
BP	L-glutamate transport	0.0436	18	224	2	0.009	0.111	GO:0015813	P49768,Q9UPY5
BP	thymocyte apoptotic process	0.0436	18	224	2	0.009	0.111	GO:0070242	Q16611,P10071
BP	regulation of interleukin-5 production	0.0475	19	224	2	0.009	0.105	GO:0032674	P23771,Q9UJU2
BP	bicellular tight junction assembly	0.0499	51	224	3	0.013	0.059	GO:0070830	O43623,O95863,P25054
CC	pigment granule	2.46e-12	105	224	16	0.071	0.152	GO:0048770	O00194,Q96EV8,P51159,P17643,Q8N565,Q13637,P57729,Q14956,Q13402,O00560,P62820,P05556,Q8NFW9,P07101,P40967,Q9Y4I1
CC	adherens junction	0.000444	500	224	17	0.076	0.034	GO:0005912	Q13642,P22607,P35372,P09619,Q14192,Q96N67,P36507,P25054,O00560,Q14108,Q8TF72,P00533,Q13796,P05556,Q02750,P19022,Q13643
CC	beta-catenin-TCF complex	0.00182	3	224	2	0.009	0.667	GO:1990907	Q9UJU2,Q9NQB0
CC	nuclear chromatin	0.00305	344	224	12	0.054	0.035	GO:0000790	O43623,Q02078,P36402,P23771,Q13547,P16220,O15164,Q15306,Q9NQB0,Q99967,Q92769,P35713
CC	M band	0.0149	29	224	3	0.013	0.103	GO:0031430	Q14192,Q8N3K9,A8MU46
CC	membrane raft	0.0217	292	224	9	0.04	0.031	GO:0045121	P49768,P35372,P41143,P24530,O00560,P49810,P00533,P05556,P19022
CC	NuRD complex	0.0361	16	224	2	0.009	0.125	GO:0016581	Q13547,Q92769
CC	microvillus	0.0364	81	224	4	0.018	0.049	GO:0005902	P16234,Q13402,Q6PIF6,Q9NQT8
CC	microtubule	0.0382	388	224	10	0.045	0.026	GO:0005874	P62491,O95996,P36507,P25054,Q9H1H9,Q8TF72,Q13796,Q2M3G4,Q9Y4I1,Q9NQT8
CC	I band	0.0485	135	224	5	0.022	0.037	GO:0031674	P49768,Q14192,P49810,Q13643,A8MU46
MF	transcription regulatory region DNA binding	4.82e-23	847	224	54	0.241	0.064	GO:0044212	P57073,Q92481,Q7Z6R9,Q02078,P19532,P10070,P36402,Q06413,Q92754,Q03060,P56693,P15976,O14948,P10071,P23771,P35712,P08151,P19484,Q13547,Q14814,Q6VUC0,P16220,O15164,P18846,O95863,P48436,Q99966,P04198,P41225,O60663,P01106,P05549,Q15306,Q9UJU2,Q02556,Q9UN79,P37275,Q9NQB0,Q9HCS4,Q8TE12,Q05925,Q9H6I2,O14753,Q15303,P23769,P48431,O00570,Q93074,Q3KNW1,O75030,Q92769,P35713,Q00978,Q02080
MF	calcium channel activity	7.99e-07	112	224	11	0.049	0.098	GO:0005262	Q8TDD5,P49768,Q9HCF6,Q9GZU1,Q96QT4,P35372,Q9BX84,Q7Z4N2,Q8NFF2,Q8IZK6,Q9HC58
MF	oxidoreductase activity, acting on paired donors, with incorporation or reduction of molecular oxygen, reduced pteridine as one donor, and incorporation of one atom of oxygen	0.000303	7	224	3	0.013	0.429	GO:0016714	Q9H0N5,P61457,P07101
MF	4-alpha-hydroxytetrahydrobiopterin dehydratase activity	0.000708	2	224	2	0.009	1	GO:0008124	Q9H0N5,P61457
MF	glutamine-fructose-6-phosphate transaminase (isomerizing) activity	0.000708	2	224	2	0.009	1	GO:0004360	O94808,Q06210
MF	IMP dehydrogenase activity	0.00182	3	224	2	0.009	0.667	GO:0003938	P20839,P12268
MF	GTPase activity	0.00222	284	224	11	0.049	0.039	GO:0003924	O00194,P51159,P29992,P62491,Q13637,P57729,P30793,P62820,P50148,Q9H0U4,Q15907
MF	3-beta-hydroxy-delta5-steroid dehydrogenase activity	0.0073	6	224	2	0.009	0.333	GO:0003854	Q9H2F3,P14060
MF	aspartic endopeptidase activity, intramembrane cleaving	0.0073	6	224	2	0.009	0.333	GO:0042500	P49768,P49810
MF	histone deacetylase activity (H3-K14 specific)	0.0209	11	224	2	0.009	0.182	GO:0031078	Q13547,Q92769
MF	protein kinase activator activity	0.0259	70	224	4	0.018	0.057	GO:0030295	P21860,P36507,Q02297,Q02750
MF	sodium ion binding	0.0276	13	224	2	0.009	0.154	GO:0031402	Q8NFF2,Q9HC58
MF	miRNA binding	0.0303	14	224	2	0.009	0.143	GO:0035198	Q06413,P48431
MF	ubiquitin-specific protease activity involved in positive regulation of ERAD pathway	0.0303	1	224	1	0.004	1	GO:1904454	Q92995
MF	growth hormone receptor activity	0.0303	1	224	1	0.004	1	GO:0004903	P10912
MF	GTP cyclohydrolase I activity	0.0303	1	224	1	0.004	1	GO:0003934	P30793
MF	cystine:glutamate antiporter activity	0.0303	1	224	1	0.004	1	GO:0015327	Q9UPY5
MF	metalloendopeptidase activity	0.0303	115	224	5	0.022	0.043	GO:0004222	P42892,O60344,Q9P2N4,P59510,P23276
MF	prolactin receptor activity	0.0303	1	224	1	0.004	1	GO:0004925	P16471
MF	peptidyl-dipeptidase inhibitor activity	0.0303	1	224	1	0.004	1	GO:0060422	P51654
MF	cholest-5-ene-3-beta,7-alpha-diol 3-beta-dehydrogenase activity	0.0303	1	224	1	0.004	1	GO:0047016	Q9H2F3
MF	potassium ion binding	0.0325	15	224	2	0.009	0.133	GO:0030955	Q8NFF2,Q9HC58
MF	K63-linked polyubiquitin modification-dependent protein binding	0.0475	19	224	2	0.009	0.105	GO:0070530	Q96CV9,Q9Y6K9
P59510	ADAMTS20	ADAM metallopeptidase with thrombospondin type 1 motif 20 [Source:HGNC Symbol;Acc:HGNC:17178]
Q9P2N4	ADAMTS9	ADAM metallopeptidase with thrombospondin type 1 motif 9 [Source:HGNC Symbol;Acc:HGNC:13202]
P08588	ADRB1	adrenoceptor beta 1 [Source:HGNC Symbol;Acc:HGNC:285]
P07550	ADRB2	adrenoceptor beta 2 [Source:HGNC Symbol;Acc:HGNC:286]
P13945	ADRB3	adrenoceptor beta 3 [Source:HGNC Symbol;Acc:HGNC:288]
Q9UM73	ALK	ALK receptor tyrosine kinase [Source:HGNC Symbol;Acc:HGNC:427]
O43747	AP1G1	adaptor related protein complex 1 gamma 1 subunit [Source:HGNC Symbol;Acc:HGNC:555]
O75843	AP1G2	adaptor related protein complex 1 gamma 2 subunit [Source:HGNC Symbol;Acc:HGNC:556]
Q9BXS5	AP1M1	adaptor related protein complex 1 mu 1 subunit [Source:HGNC Symbol;Acc:HGNC:13667]
Q9Y6Q5	AP1M2	adaptor related protein complex 1 mu 2 subunit [Source:HGNC Symbol;Acc:HGNC:558]
A9JT98	N/A	N/A
O00203	AP3B1	adaptor related protein complex 3 beta 1 subunit [Source:HGNC Symbol;Acc:HGNC:566]
Q13367	AP3B2	adaptor related protein complex 3 beta 2 subunit [Source:HGNC Symbol;Acc:HGNC:567]
O95996	APC2	APC2, WNT signaling pathway regulator [Source:HGNC Symbol;Acc:HGNC:24036]
P25054	APC	APC, WNT signaling pathway regulator [Source:HGNC Symbol;Acc:HGNC:583]
P18846	ATF1	activating transcription factor 1 [Source:HGNC Symbol;Acc:HGNC:783]
O75882	ATRN	attractin [Source:HGNC Symbol;Acc:HGNC:885]
Q5VV63	ATRNL1	attractin like 1 [Source:HGNC Symbol;Acc:HGNC:29063]
Q16611	BAK1	BCL2 antagonist/killer 1 [Source:HGNC Symbol;Acc:HGNC:949]
P10415	BCL2	BCL2, apoptosis regulator [Source:HGNC Symbol;Acc:HGNC:990]
Q07817	BCL2L1	BCL2 like 1 [Source:HGNC Symbol;Acc:HGNC:992]
Q92843	BCL2L2/BCL2L2-PABPN1	BCL2 like 2 [Source:HGNC Symbol;Acc:HGNC:995]/BCL2L2-PABPN1 readthrough [Source:HGNC Symbol;Acc:HGNC:42959]
Q01954	BNC1	basonuclin 1 [Source:HGNC Symbol;Acc:HGNC:1081]
Q6ZN30	BNC2	basonuclin 2 [Source:HGNC Symbol;Acc:HGNC:30988]
Q8TDC3	BRSK1	BR serine/threonine kinase 1 [Source:HGNC Symbol;Acc:HGNC:18994]
Q8IWQ3	BRSK2	BR serine/threonine kinase 2 [Source:HGNC Symbol;Acc:HGNC:11405]
P19022	CDH2	cadherin 2 [Source:HGNC Symbol;Acc:HGNC:1759]
P55283	CDH4	cadherin 4 [Source:HGNC Symbol;Acc:HGNC:1763]
Q99966	CITED1	Cbp/p300 interacting transactivator with Glu/Asp rich carboxy-terminal domain 1 [Source:HGNC Symbol;Acc:HGNC:1986]
Q99967	CITED2	Cbp/p300 interacting transactivator with Glu/Asp rich carboxy-terminal domain 2 [Source:HGNC Symbol;Acc:HGNC:1987]
Q99967	CITED2	Cbp/p300 interacting transactivator with Glu/Asp rich carboxy-terminal domain 2 [Source:HGNC Symbol;Acc:HGNC:1987]
P16220	CREB1	cAMP responsive element binding protein 1 [Source:HGNC Symbol;Acc:HGNC:2345]
Q03060	CREM	cAMP responsive element modulator [Source:HGNC Symbol;Acc:HGNC:2352]
O75462	CRLF1	cytokine receptor like factor 1 [Source:HGNC Symbol;Acc:HGNC:2364]
P07333	CSF1R	colony stimulating factor 1 receptor [Source:HGNC Symbol;Acc:HGNC:2433]
Q8N3K9	CMYA5	cardiomyopathy associated 5 [Source:HGNC Symbol;Acc:HGNC:14305]
P29812	N/A	N/A
Q96HP0	DOCK6	dedicator of cytokinesis 6 [Source:HGNC Symbol;Acc:HGNC:19189]
Q96N67	DOCK7	dedicator of cytokinesis 7 [Source:HGNC Symbol;Acc:HGNC:19190]
Q8NF50	DOCK8	dedicator of cytokinesis 8 [Source:HGNC Symbol;Acc:HGNC:19191]
P14416	DRD2	dopamine receptor D2 [Source:HGNC Symbol;Acc:HGNC:3023]
F1QQR5	N/A	N/A
P35462	DRD3	dopamine receptor D3 [Source:HGNC Symbol;Acc:HGNC:3024]
P21917	DRD4	dopamine receptor D4 [Source:HGNC Symbol;Acc:HGNC:3025]
Q5TYU0	N/A	N/A
Q96EV8	DTNBP1	dystrobrevin binding protein 1 [Source:HGNC Symbol;Acc:HGNC:17328]
P42892	ECE1	endothelin converting enzyme 1 [Source:HGNC Symbol;Acc:HGNC:3146]
O60344	ECE2	endothelin converting enzyme 2 [Source:HGNC Symbol;Acc:HGNC:13275]
P05305	EDN1	endothelin 1 [Source:HGNC Symbol;Acc:HGNC:3176]
P20800	EDN2	endothelin 2 [Source:HGNC Symbol;Acc:HGNC:3177]
A0A0K0WSQ7	N/A	N/A
P14138	EDN3	endothelin 3 [Source:HGNC Symbol;Acc:HGNC:3178]
P25101	EDNRA	endothelin receptor type A [Source:HGNC Symbol;Acc:HGNC:3179]
NA	N/A	N/A
P24530	EDNRB	endothelin receptor type B [Source:HGNC Symbol;Acc:HGNC:3180]
P00533	EGFR	epidermal growth factor receptor [Source:HGNC Symbol;Acc:HGNC:3236]
Q05925	EN1	engrailed homeobox 1 [Source:HGNC Symbol;Acc:HGNC:3342]
P19622	EN2	engrailed homeobox 2 [Source:HGNC Symbol;Acc:HGNC:3343]
P04626	ERBB2	erb-b2 receptor tyrosine kinase 2 [Source:HGNC Symbol;Acc:HGNC:3430]
P21860	ERBB3	erb-b2 receptor tyrosine kinase 3 [Source:HGNC Symbol;Acc:HGNC:3431]
Q15303	ERBB4	erb-b2 receptor tyrosine kinase 4 [Source:HGNC Symbol;Acc:HGNC:3432]
P11362	FGFR1	fibroblast growth factor receptor 1 [Source:HGNC Symbol;Acc:HGNC:3688]
P21802	FGFR2	fibroblast growth factor receptor 2 [Source:HGNC Symbol;Acc:HGNC:3689]
P22455	FGFR4	fibroblast growth factor receptor 4 [Source:HGNC Symbol;Acc:HGNC:3691]
P22607	FGFR3	fibroblast growth factor receptor 3 [Source:HGNC Symbol;Acc:HGNC:3690]
Q13642	FHL1	four and a half LIM domains 1 [Source:HGNC Symbol;Acc:HGNC:3702]
Q14192	FHL2	four and a half LIM domains 2 [Source:HGNC Symbol;Acc:HGNC:3703]
Q13643	FHL3	four and a half LIM domains 3 [Source:HGNC Symbol;Acc:HGNC:3704]
Q5TD97	FHL5	four and a half LIM domains 5 [Source:HGNC Symbol;Acc:HGNC:17371]
P36888	FLT3	fms related tyrosine kinase 3 [Source:HGNC Symbol;Acc:HGNC:3765]
Q5SZK8	FREM2	FRAS1 related extracellular matrix protein 2 [Source:HGNC Symbol;Acc:HGNC:25396]
P0C091	FREM3	FRAS1 related extracellular matrix 3 [Source:HGNC Symbol;Acc:HGNC:25172]
P15976	GATA1	GATA binding protein 1 [Source:HGNC Symbol;Acc:HGNC:4170]
P23769	GATA2	GATA binding protein 2 [Source:HGNC Symbol;Acc:HGNC:4171]
P23771	GATA3	GATA binding protein 3 [Source:HGNC Symbol;Acc:HGNC:4172]
P30793	GCH1	GTP cyclohydrolase 1 [Source:HGNC Symbol;Acc:HGNC:4193]
Q90WT2	N/A	N/A
Q06210	GFPT1	glutamine--fructose-6-phosphate transaminase 1 [Source:HGNC Symbol;Acc:HGNC:4241]
O94808	GFPT2	glutamine-fructose-6-phosphate transaminase 2 [Source:HGNC Symbol;Acc:HGNC:4242]
P01241	GH1	growth hormone 1 [Source:HGNC Symbol;Acc:HGNC:4261]
P10912	GHR	growth hormone receptor [Source:HGNC Symbol;Acc:HGNC:4263]
P08151	GLI1	GLI family zinc finger 1 [Source:HGNC Symbol;Acc:HGNC:4317]
P10070	GLI2	GLI family zinc finger 2 [Source:HGNC Symbol;Acc:HGNC:4318]
P10071	GLI3	GLI family zinc finger 3 [Source:HGNC Symbol;Acc:HGNC:4319]
P29992	GNA11	G protein subunit alpha 11 [Source:HGNC Symbol;Acc:HGNC:4379]
P50148	GNAQ	G protein subunit alpha q [Source:HGNC Symbol;Acc:HGNC:4390]
P51654	GPC3	glypican 3 [Source:HGNC Symbol;Acc:HGNC:4451]
V5NF21	N/A	N/A
P78333	GPC5	glypican 5 [Source:HGNC Symbol;Acc:HGNC:4453]
Q14956	GPNMB	glycoprotein nmb [Source:HGNC Symbol;Acc:HGNC:4462]
Q13547	HDAC1	histone deacetylase 1 [Source:HGNC Symbol;Acc:HGNC:4852]
Q92769	HDAC2	histone deacetylase 2 [Source:HGNC Symbol;Acc:HGNC:4853]
P14060	HSD3B1	hydroxy-delta-5-steroid dehydrogenase, 3 beta- and steroid delta-isomerase 1 [Source:HGNC Symbol;Acc:HGNC:5217]
Q9H2F3	HSD3B7	hydroxy-delta-5-steroid dehydrogenase, 3 beta- and steroid delta-isomerase 7 [Source:HGNC Symbol;Acc:HGNC:18324]
Q5DX21	IGSF11	immunoglobulin superfamily member 11 [Source:HGNC Symbol;Acc:HGNC:16669]
A5PLG6	N/A	N/A
Q9Y6K9	IKBKG	inhibitor of nuclear factor kappa B kinase subunit gamma [Source:HGNC Symbol;Acc:HGNC:5961]
P20839	IMPDH1	inosine monophosphate dehydrogenase 1 [Source:HGNC Symbol;Acc:HGNC:6052]
P12268	IMPDH2	inosine monophosphate dehydrogenase 2 [Source:HGNC Symbol;Acc:HGNC:6053]
A8E5I1	N/A	N/A
Q15306	IRF4	interferon regulatory factor 4 [Source:HGNC Symbol;Acc:HGNC:6119]
Q02556	IRF8	interferon regulatory factor 8 [Source:HGNC Symbol;Acc:HGNC:5358]
Q00978	IRF9	interferon regulatory factor 9 [Source:HGNC Symbol;Acc:HGNC:6131]
P05556	ITGB1	integrin subunit beta 1 [Source:HGNC Symbol;Acc:HGNC:6153]
P05107	ITGB2	integrin subunit beta 2 [Source:HGNC Symbol;Acc:HGNC:6155]
P26010	ITGB7	integrin subunit beta 7 [Source:HGNC Symbol;Acc:HGNC:6162]
P23276	KEL	Kell blood group, metallo-endopeptidase [Source:HGNC Symbol;Acc:HGNC:6308]
Q9H1H9	KIF13A	kinesin family member 13A [Source:HGNC Symbol;Acc:HGNC:14566]
Q9NQT8	KIF13B	kinesin family member 13B [Source:HGNC Symbol;Acc:HGNC:14405]
P10721	KIT	KIT proto-oncogene receptor tyrosine kinase [Source:HGNC Symbol;Acc:HGNC:6342]
Q9UJU2	LEF1	lymphoid enhancer binding factor 1 [Source:HGNC Symbol;Acc:HGNC:6551]
F1QFN7	N/A	N/A
Q8TE12	LMX1A	LIM homeobox transcription factor 1 alpha [Source:HGNC Symbol;Acc:HGNC:6653]
O60663	LMX1B	LIM homeobox transcription factor 1 beta [Source:HGNC Symbol;Acc:HGNC:6654]
P29376	LTK	leukocyte receptor tyrosine kinase [Source:HGNC Symbol;Acc:HGNC:6721]
Q02750	MAP2K1	mitogen-activated protein kinase kinase 1 [Source:HGNC Symbol;Acc:HGNC:6840]
P36507	MAP2K2	mitogen-activated protein kinase kinase 2 [Source:HGNC Symbol;Acc:HGNC:6842]
Q01726	MC1R	melanocortin 1 receptor [Source:HGNC Symbol;Acc:HGNC:6929]
Q96G30	MRAP2	melanocortin 2 receptor accessory protein 2 [Source:HGNC Symbol;Acc:HGNC:21232]
P41968	MC3R	melanocortin 3 receptor [Source:HGNC Symbol;Acc:HGNC:6931]
P32245	MC4R	melanocortin 4 receptor [Source:HGNC Symbol;Acc:HGNC:6932]
P33032	MC5R	melanocortin 5 receptor [Source:HGNC Symbol;Acc:HGNC:6933]
Q9GZU1	MCOLN1	mucolipin 1 [Source:HGNC Symbol;Acc:HGNC:13356]
Q8IZK6	MCOLN2	mucolipin 2 [Source:HGNC Symbol;Acc:HGNC:13357]
Q8TDD5	MCOLN3	mucolipin 3 [Source:HGNC Symbol;Acc:HGNC:13358]
Q86YW9	MED12L	mediator complex subunit 12 like [Source:HGNC Symbol;Acc:HGNC:16050]
Q93074	MED12	mediator complex subunit 12 [Source:HGNC Symbol;Acc:HGNC:11957]
Q02078	MEF2A	myocyte enhancer factor 2A [Source:HGNC Symbol;Acc:HGNC:6993]
Q02080	MEF2B	myocyte enhancer factor 2B [Source:HGNC Symbol;Acc:HGNC:6995]
Q06413	MEF2C	myocyte enhancer factor 2C [Source:HGNC Symbol;Acc:HGNC:6996]
Q14814	MEF2D	myocyte enhancer factor 2D [Source:HGNC Symbol;Acc:HGNC:6997]
O60291	MGRN1	mahogunin ring finger 1 [Source:HGNC Symbol;Acc:HGNC:20254]
O75030	MITF	melanogenesis associated transcription factor [Source:HGNC Symbol;Acc:HGNC:7105]
Q9BV36	MLPH	melanophilin [Source:HGNC Symbol;Acc:HGNC:29643]
Q6GQM0	N/A	N/A
Q8N565	MREG	melanoregulin [Source:HGNC Symbol;Acc:HGNC:25478]
F1QDI6	N/A	N/A
P12524	MYCL	MYCL proto-oncogene, bHLH transcription factor [Source:HGNC Symbol;Acc:HGNC:7555]
P01106	MYC	MYC proto-oncogene, bHLH transcription factor [Source:HGNC Symbol;Acc:HGNC:7553]
P04198	MYCN	MYCN proto-oncogene, bHLH transcription factor [Source:HGNC Symbol;Acc:HGNC:7559]
Q9Y4I1	MYO5A	myosin VA [Source:HGNC Symbol;Acc:HGNC:7602]
F1QYD8	N/A	N/A
Q9ULV0	MYO5B	myosin VB [Source:HGNC Symbol;Acc:HGNC:7603]
Q9NQX4	MYO5C	myosin VC [Source:HGNC Symbol;Acc:HGNC:7604]
Q13402	MYO7A	myosin VIIA [Source:HGNC Symbol;Acc:HGNC:7606]
Q6PIF6	MYO7B	myosin VIIB [Source:HGNC Symbol;Acc:HGNC:7607]
Q8NFW9	MYRIP	myosin VIIA and Rab interacting protein [Source:HGNC Symbol;Acc:HGNC:19156]
Q7Z6K4	NRARP	NOTCH regulated ankyrin repeat protein [Source:HGNC Symbol;Acc:HGNC:33843]
Q02297	NRG1	neuregulin 1 [Source:HGNC Symbol;Acc:HGNC:7997]
O14511	NRG2	neuregulin 2 [Source:HGNC Symbol;Acc:HGNC:7998]
P41143	OPRD1	opioid receptor delta 1 [Source:HGNC Symbol;Acc:HGNC:8153]
P41145	OPRK1	opioid receptor kappa 1 [Source:HGNC Symbol;Acc:HGNC:8154]
P41146	OPRL1	opioid related nociceptin receptor 1 [Source:HGNC Symbol;Acc:HGNC:8155]
P35372	OPRM1	opioid receptor mu 1 [Source:HGNC Symbol;Acc:HGNC:8156]
Q96CV9	OPTN	optineurin [Source:HGNC Symbol;Acc:HGNC:17142]
O14753	OVOL1	ovo like transcriptional repressor 1 [Source:HGNC Symbol;Acc:HGNC:8525]
Q9BRP0	OVOL2	ovo like zinc finger 2 [Source:HGNC Symbol;Acc:HGNC:15804]
O00110	OVOL3	ovo like zinc finger 3 [Source:HGNC Symbol;Acc:HGNC:14186]
P23760	PAX3	paired box 3 [Source:HGNC Symbol;Acc:HGNC:8617]
P23759	PAX7	paired box 7 [Source:HGNC Symbol;Acc:HGNC:8621]
P61457	PCBD1	pterin-4 alpha-carbinolamine dehydratase 1 [Source:HGNC Symbol;Acc:HGNC:8646]
Q9H0N5	PCBD2	pterin-4 alpha-carbinolamine dehydratase 2 [Source:HGNC Symbol;Acc:HGNC:24474]
P16234	PDGFRA	platelet derived growth factor receptor alpha [Source:HGNC Symbol;Acc:HGNC:8803]
P09619	PDGFRB	platelet derived growth factor receptor beta [Source:HGNC Symbol;Acc:HGNC:8804]
P40967	PMEL	premelanosome protein [Source:HGNC Symbol;Acc:HGNC:10880]
Q7SZW5	N/A	N/A
Q6P016	N/A	N/A
Q66ID4	N/A	N/A
Q1LWJ1	N/A	N/A
Q86WC6	PPP1R27	protein phosphatase 1 regulatory subunit 27 [Source:HGNC Symbol;Acc:HGNC:16813]
P16471	PRLR	prolactin receptor [Source:HGNC Symbol;Acc:HGNC:9446]
P49768	PSEN1	presenilin 1 [Source:HGNC Symbol;Acc:HGNC:9508]
P49810	PSEN2	presenilin 2 [Source:HGNC Symbol;Acc:HGNC:9509]
F1RDZ1	N/A	N/A
P62491	RAB11A	RAB11A, member RAS oncogene family [Source:HGNC Symbol;Acc:HGNC:9760]
Q15907	RAB11B	RAB11B, member RAS oncogene family [Source:HGNC Symbol;Acc:HGNC:9761]
P62820	RAB1A	RAB1A, member RAS oncogene family [Source:HGNC Symbol;Acc:HGNC:9758]
Q9H0U4	RAB1B	RAB1B, member RAS oncogene family [Source:HGNC Symbol;Acc:HGNC:18370]
P51159	RAB27A	RAB27A, member RAS oncogene family [Source:HGNC Symbol;Acc:HGNC:9766]
O00194	RAB27B	RAB27B, member RAS oncogene family [Source:HGNC Symbol;Acc:HGNC:9767]
Q13637	RAB32	RAB32, member RAS oncogene family [Source:HGNC Symbol;Acc:HGNC:9772]
P57729	RAB38	RAB38, member RAS oncogene family [Source:HGNC Symbol;Acc:HGNC:9776]
Q8TBN0	RAB3IL1	RAB3A interacting protein like 1 [Source:HGNC Symbol;Acc:HGNC:9780]
Q96QF0	RAB3IP	RAB3A interacting protein [Source:HGNC Symbol;Acc:HGNC:16508]
E7FDX4	N/A	N/A
Q9NPQ8	RIC8A	RIC8 guanine nucleotide exchange factor A [Source:HGNC Symbol;Acc:HGNC:29550]
Q9NVN3	RIC8B	RIC8 guanine nucleotide exchange factor B [Source:HGNC Symbol;Acc:HGNC:25555]
Q96PX1	RNF157	ring finger protein 157 [Source:HGNC Symbol;Acc:HGNC:29402]
I3JL55	N/A	N/A
Q14108	SCARB2	scavenger receptor class B member 2 [Source:HGNC Symbol;Acc:HGNC:1665]
Q9H190	SDCBP2	syndecan binding protein 2 [Source:HGNC Symbol;Acc:HGNC:15756]
O00560	SDCBP	syndecan binding protein [Source:HGNC Symbol;Acc:HGNC:10662]
Q9H9B4	SFXN1	sideroflexin 1 [Source:HGNC Symbol;Acc:HGNC:16085]
Q9BWM7	SFXN3	sideroflexin 3 [Source:HGNC Symbol;Acc:HGNC:16087]
Q2M3G4	SHROOM1	shroom family member 1 [Source:HGNC Symbol;Acc:HGNC:24084]
Q13796	SHROOM2	shroom family member 2 [Source:HGNC Symbol;Acc:HGNC:630]
Q8TF72	SHROOM3	shroom family member 3 [Source:HGNC Symbol;Acc:HGNC:30422]
Q9ULL8	SHROOM4	shroom family member 4 [Source:HGNC Symbol;Acc:HGNC:29215]
Q9HC58	SLC24A3	solute carrier family 24 member 3 [Source:HGNC Symbol;Acc:HGNC:10977]
E9QFK0	N/A	N/A
Q8NFF2	SLC24A4	solute carrier family 24 member 4 [Source:HGNC Symbol;Acc:HGNC:10978]
F1QSV1	N/A	N/A
Q9UPY5	SLC7A11	solute carrier family 7 member 11 [Source:HGNC Symbol;Acc:HGNC:11059]
A8MU46	SMTNL1	smoothelin like 1 [Source:HGNC Symbol;Acc:HGNC:32394]
O95863	SNAI1	snail family transcriptional repressor 1 [Source:HGNC Symbol;Acc:HGNC:11128]
O43623	SNAI2	snail family transcriptional repressor 2 [Source:HGNC Symbol;Acc:HGNC:11094]
Q3KNW1	SNAI3	snail family transcriptional repressor 3 [Source:HGNC Symbol;Acc:HGNC:18411]
P56693	SOX10	SRY-box 10 [Source:HGNC Symbol;Acc:HGNC:11190]
Q9UN79	SOX13	SRY-box 13 [Source:HGNC Symbol;Acc:HGNC:11192]
Q9H6I2	SOX17	SRY-box 17 [Source:HGNC Symbol;Acc:HGNC:18122]
P35713	SOX18	SRY-box 18 [Source:HGNC Symbol;Acc:HGNC:11194]
P47792	N/A	N/A
O00570	SOX1	SRY-box 1 [Source:HGNC Symbol;Acc:HGNC:11189]
P48431	SOX2	SRY-box 2 [Source:HGNC Symbol;Acc:HGNC:11195]
P41225	SOX3	SRY-box 3 [Source:HGNC Symbol;Acc:HGNC:11199]
P35711	SOX5	SRY-box 5 [Source:HGNC Symbol;Acc:HGNC:11201]
P35712	SOX6	SRY-box 6 [Source:HGNC Symbol;Acc:HGNC:16421]
P40646	N/A	N/A
P57073	SOX8	SRY-box 8 [Source:HGNC Symbol;Acc:HGNC:11203]
P48436	SOX9	SRY-box 9 [Source:HGNC Symbol;Acc:HGNC:11204]
Q9HCS4	TCF7L1	transcription factor 7 like 1 [Source:HGNC Symbol;Acc:HGNC:11640]
Q9NQB0	TCF7L2	transcription factor 7 like 2 [Source:HGNC Symbol;Acc:HGNC:11641]
P36402	TCF7	transcription factor 7 [Source:HGNC Symbol;Acc:HGNC:11639]
P05549	TFAP2A	transcription factor AP-2 alpha [Source:HGNC Symbol;Acc:HGNC:11742]
Q92481	TFAP2B	transcription factor AP-2 beta [Source:HGNC Symbol;Acc:HGNC:11743]
Q92754	TFAP2C	transcription factor AP-2 gamma [Source:HGNC Symbol;Acc:HGNC:11744]
Q7Z6R9	TFAP2D	transcription factor AP-2 delta [Source:HGNC Symbol;Acc:HGNC:15581]
Q6VUC0	TFAP2E	transcription factor AP-2 epsilon [Source:HGNC Symbol;Acc:HGNC:30774]
P19532	TFE3	transcription factor binding to IGHM enhancer 3 [Source:HGNC Symbol;Acc:HGNC:11752]
P19484	TFEB	transcription factor EB [Source:HGNC Symbol;Acc:HGNC:11753]
O14948	TFEC	transcription factor EC [Source:HGNC Symbol;Acc:HGNC:11754]
Q6IVB6	N/A	N/A
P07101	TH	tyrosine hydroxylase [Source:HGNC Symbol;Acc:HGNC:11782]
O75865	TRAPPC6A	trafficking protein particle complex 6A [Source:HGNC Symbol;Acc:HGNC:23069]
Q86SZ2	TRAPPC6B	trafficking protein particle complex 6B [Source:HGNC Symbol;Acc:HGNC:23066]
O15164	TRIM24	tripartite motif containing 24 [Source:HGNC Symbol;Acc:HGNC:11812]
Q9UPN9	TRIM33	tripartite motif containing 33 [Source:HGNC Symbol;Acc:HGNC:16290]
O15016	TRIM66	tripartite motif containing 66 [Source:HGNC Symbol;Acc:HGNC:29005]
Q7Z4N2	TRPM1	transient receptor potential cation channel subfamily M member 1 [Source:HGNC Symbol;Acc:HGNC:7146]
Q9HCF6	TRPM3	transient receptor potential cation channel subfamily M member 3 [Source:HGNC Symbol;Acc:HGNC:17992]
Q9BX84	TRPM6	transient receptor potential cation channel subfamily M member 6 [Source:HGNC Symbol;Acc:HGNC:17995]
Q96QT4	TRPM7	transient receptor potential cation channel subfamily M member 7 [Source:HGNC Symbol;Acc:HGNC:17994]
P17643	TYRP1	tyrosinase related protein 1 [Source:HGNC Symbol;Acc:HGNC:12450]
Q92995	USP13	ubiquitin specific peptidase 13 (isopeptidase T-3) [Source:HGNC Symbol;Acc:HGNC:12611]
P45974	USP5	ubiquitin specific peptidase 5 [Source:HGNC Symbol;Acc:HGNC:12628]
Q9HCJ6	VAT1L	vesicle amine transport 1 like [Source:HGNC Symbol;Acc:HGNC:29315]
Q99536	VAT1	vesicle amine transport 1 [Source:HGNC Symbol;Acc:HGNC:16919]
P56704	WNT3A	Wnt family member 3A [Source:HGNC Symbol;Acc:HGNC:15983]
P56703	WNT3	Wnt family member 3 [Source:HGNC Symbol;Acc:HGNC:12782]
P37275	ZEB1	zinc finger E-box binding homeobox 1 [Source:HGNC Symbol;Acc:HGNC:11642]
O60315	ZEB2	zinc finger E-box binding homeobox 2 [Source:HGNC Symbol;Acc:HGNC:14881]
